# Supplementary material
Source: publisher figshare collection journal article supplement (https://tandf.figshare.com/ndownloader/files/34835747)
Supplement: Supplementary file 1 [file 34835747]

Supplementary File 1. Search strategies conducted on July 16th, 2020

| **Database** | **Results** | **Keywords** |
| --- | --- | --- |
| **MEDLINE** | 370 | 1. exp Wheelchairs/  2. (wheelchair* or wheel chair* or scooter*).ab,kw,ti.  3. ((wheeled or motorized or motorised) adj2 mobility).ab,kw,ti.  4. 1 or 2 or 3  5. exp Education, Professional/  6. exp Competency-Based Education/  7. exp Clinical Competence/  8. exp Health Personnel/ed [Education]  9. ((educat* or teach* or learn* or train* or mentor* or professor* or pedagog* or program*) adj2 (universit* or academ* or curricul* or student* or personnel* or professional* or clinician* or physical therap* or physiotherap* or occupational therap* or nurse* or physician* or recreation therap* or physiatrist* or prosthetist* or orthotist* or technician* or develop* or integrat* or implement* or framework* or frame work* or model* or approach*)).ab,kw,ti.  10. ((rehab* or physical therap* or physiotherap* or occupational therap*) adj2 (assistant* or aid*)).ab,kw,ti.  11. ((clinical or clinician* or assess* or eval*) adj2 (skill* or competen* or outcome*)).ab,kw,ti.  12. ((wheelchair* or wheel chair*) adj2 (service provision* or care deliver* or service deliver* or care provision*)).ab,kw,ti.  13. 4 or 5 or 6 or 7 or 8 or 9 or 10 or 11  14. 3 and 12  15. limit 12 to (yr="1993 -Current" and (english or french)) |
| **Embase** | 601 | Same as Medline |
| **EBM reviews (Cochrane Database of Systematic Reviews, ACP Journal club, Database of Abstracts of Reviews of Effects, Cochrane Clinical Answers, Cochrane Central Register of Controlled trials, Cochrane methodology register, Health technology assessment, NHS Economic Evaluation Database)** | 106 | Same as Medline |
| **CINAHL** | 1326 | **S1** (MH "Wheelchairs+")  **S2** TI ( wheelchair* or wheel chair* or scooter*) OR AB ( wheelchair* or wheel chair* or scooter*) OR SU ( wheelchair* or wheel chair* or scooter*)  **S3** TI ( (wheeled or motorized or motorised) N2 mobility ) OR AB ( (wheeled or motorized or motorised) N2 mobility ) OR SU ( (wheeled or motorized or motorised) N2 mobility )  **S4** S1 OR S2 OR S3  **S5** (MH "Professional Competence+")  **S6** (MH "Curriculum+") OR (MH "Education, Clinical+") OR (MH "Education, Health Sciences+") OR (MH "Education, Premedical") OR (MH "Learning Methods+") OR (MH "Program Development+") OR (MH "Outcomes of Education") OR (MH "Staff Development+") OR (MH "Students+") OR (MH "Teaching+") OR (MH "Teachers")  **S7** (MH "Education, Competency-Based") OR (MH "Competency Assessment")  **S8** (MH "Health Personnel+/ED")  **S9** TI ( (educat* or teach* or learn* or train* or mentor* or professor* or pedagog* or program*) N2 (universit* or academ* or curricul* or student* or personnel* or professional* or clinician* or physical therap* or physiotherap* or occupational therap* or nurs* or physician* or recreation therap* or physiatrist* or prosthetist* or orthotist* or technician* or develop* or integrat* or implement* or framework* or frame work* or model* or approach*) ) OR AB (educat* or teach* or learn* or train* or mentor* or professor* or pedagog* or program*) N2 (universit* or academ* or curricul* or student* or personnel* or professional* or clinician* or physical therap* or physiotherap* or occupational therap* or nurs* or physician* or recreation therapist* or physiatrist* or prosthetist* or orthotist* or technician* or develop* or integrat* or implement* or framework* or frame work* or model* or approach*) ) OR SU ( (educat* or teach* or learn* or train* or mentor* or professor* or pedagog* or program*) N2 (universit* or academ* or curricul* or student* or personnel* or professional* or clinician* or physical therap* or physiotherap* or occupational therap* or nurs* or physician* or recreation therapist* or physiatrist* or prosthetist* or orthotist* or technician* or develop* or integrat* or implement* or framework* or frame work* or model* or approach*) )  **S10** TI ( (clinical or clinician* or assess* or eval*) N2 (skill* or competen* OR outcome*) ) OR AB ( (clinical or clinician* or assess* or eval*) N2 (skill* or competen* OR outcome*) ) OR SU ( (clinical or clinician* or assess* or eval*) N2 (skill* or competen* OR outcome*) )  **S11** TI ( (wheelchair* or wheel chair*) N2 (service provision* or care deliver* or service deliver* or care provision*) ) OR AB ( (wheelchair* or wheel chair*) N2 (service provision* or care deliver* or service deliver* or care provision*) ) OR SU ( (wheelchair* or wheel chair*) N2 (service provision* or care deliver* or service deliver* or care provision*) )  **S12** TI ( (rehab* or physical therap* or physiotherap* or occupational therap*) N2 (assistant* or aid*) ) OR AB ( (rehab* or physical therap* or physiotherap* or occupational therap*) N2 (assistant* or aid*) ) OR SU ( (rehab* or physical therap* or physiotherap* or occupational therap*) N2 (assistant* or aid*) )  **S13** S5 OR S6 OR S7 OR S8 OR S9 OR S10 OR S11 OR S12  **S14** S4 AND S12  **S15** S4 AND S12 Opérateurs de restriction - Date de publication: 19930101-; Langue: English, French  Opérateurs d'expansion - Appliquer des sujets équivalents  Modes de recherche - Booléen/Phrase |
| **SCOPUS** | 1766 | ( ( wheelchair* OR "wheel chair*" OR scooter* ) OR ( ( wheeled OR motorized OR motorised ) near/2 mobility ) ) AND ( ( ( educat* OR teach* OR learn* OR train* OR mentor* OR professor* OR pedagog* OR program* ) near/2 ( universit* OR academ* OR curricul* OR student* OR personnel* OR professional* OR clinician* OR "physical therap*" OR physiotherap* OR "occupational therap*" OR nurse* OR physician* OR "recreation therap*" OR prosthetist* OR orthotist* OR physiatrist* OR technician* OR develop* OR integrat* OR implement* OR "frame work*" OR framework* OR model* OR approach* ) ) OR ( ( rehab* OR "physical therap*" OR physiotherap* OR "occupational therap*" ) near/2 ( assistant* OR aid* ) ) OR ( ( clinical OR clinician* OR assess* OR eval* ) near/2 ( skill* OR competen* OR outcome* ) ) OR ( ( wheelchair* OR "wheel chair*" ) near/2 ( "service provision*" OR "care deliver*" OR "care provision*" OR "service deliver*" ) ) ) AND ( LIMIT-TO ( PUBYEAR , 2020 ) OR LIMIT-TO ( PUBYEAR , 2019 ) OR LIMIT-TO ( PUBYEAR , 2018 ) OR LIMIT-TO ( PUBYEAR , 2017 ) OR LIMIT-TO ( PUBYEAR , 2016 ) OR LIMIT-TO ( PUBYEAR , 2015 ) OR LIMIT-TO ( PUBYEAR , 2014 ) OR LIMIT-TO ( PUBYEAR , 2013 ) OR LIMIT-TO ( PUBYEAR , 2012 ) OR LIMIT-TO ( PUBYEAR , 2011 ) OR LIMIT-TO ( PUBYEAR , 2010 ) OR LIMIT-TO ( PUBYEAR , 2009 ) OR LIMIT-TO ( PUBYEAR , 2008 ) OR LIMIT-TO ( PUBYEAR , 2007 ) OR LIMIT-TO ( PUBYEAR , 2006 ) OR LIMIT-TO ( PUBYEAR , 2005 ) OR LIMIT-TO ( PUBYEAR , 2004 ) OR LIMIT-TO ( PUBYEAR , 2003 ) OR LIMIT-TO ( PUBYEAR , 2002 ) OR LIMIT-TO ( PUBYEAR , 2001 ) OR LIMIT-TO ( PUBYEAR , 2000 ) OR LIMIT-TO ( PUBYEAR , 1999 ) OR LIMIT-TO ( PUBYEAR , 1998 ) OR LIMIT-TO ( PUBYEAR , 1997 ) OR LIMIT-TO ( PUBYEAR , 1996 ) OR LIMIT-TO ( PUBYEAR , 1995 ) OR LIMIT-TO ( PUBYEAR , 1994 ) OR LIMIT-TO ( PUBYEAR , 1993 ) ) AND ( LIMIT-TO ( LANGUAGE , "English" ) OR LIMIT-TO ( LANGUAGE , "French" ) ) |
| **Academic Search Complete** | 976 | **S1** Wheelchair  **S2** TI ( wheelchair* or wheel chair* or scooter*) OR AB ( wheelchair* or wheel chair* or scooter*) OR SU ( wheelchair* or wheel chair* or scooter*)  **S3** TI ( (wheeled or motorized or motorised) N2 mobility ) OR AB ( (wheeled or motorized or motorised) N2 mobility ) OR SU ( (wheeled or motorized or motorised) N2 mobility )  **S4** S1 OR S2 OR S3  **S5** professional competence  **S6** curriculum OR clinical education OR health science education  **S7** curriculum OR clinical education OR health science education OR premedical education OR learning methods OR program development OR outcomes of education OR staff development OR students OR teaching OR teachers  **S8** TI ( (educat* or teach* or learn* or train* or mentor* or professor* or pedagog* or program*) N2 (universit* or academ* or curricul* or student* or personnel* or professional* or clinician* or physical therap* or physiotherap* or occupational therap* or nurs* or physician* or recreation therap* or physiatrist* or prosthetist* or orthotist* or technician* or development* or framework* or frame work* or model* or approach*) ) OR AB ( (educat* or teach* or learn* or train* or mentor* or professor* or pedagog* or program*) N2 (universit* or academ* or curricul* or student* or personnel* or professional* or clinician* or physical therap* or physiotherap* or occupational therap* or nurs* or physician* or recreation therap* or physiatrist* or prosthetist* or orthotist* or technician* or development* or framework* or frame work* or model* or approach*) ) OR SU ( (educat* or teach* or learn* or train* or mentor* or professor* or pedagog* or program*) N2 (universit* or academ* or curricul* or student* or personnel* or professional* or clinician* or physical therap* or physiotherap* or occupational therap* or nurs* or physician* or recreation therap* or physiatrist* or prosthetist* or orthotist* or technician* or development* or framework* or frame work* or model* or approach*) )  **S9** TI ( ( (clinical or clinician* or assess*) N2 (skill* or competen* or outcome*) ) ) OR AB ( ( (clinical or clinician* or assess*) N2 (skill* or competen* or outcome*) ) ) OR SU ( ( (clinical or clinician* or assess*) N2 (skill* or competen* or outcome*) ) )  **S10** TI ( (wheelchair* or wheel chair*) N2 (service provision* or care deliver* or service deliver* or care provision*) ) OR AB ( (wheelchair* or wheel chair*) N2 (service provision* or care deliver* or service deliver* or care provision*) ) OR SU ( (wheelchair* or wheel chair*) N2 (service provision* or care deliver* or service deliver* or care provision*) )  **S11** ( (rehab* or physical therap* or physiotherap* or occupational therap*) N2 (assistant* or aid*) ) OR AB ( (rehab* or physical therap* or physiotherap* or occupational therap*) N2 (assistant* or aid*) ) OR SU ( (rehab* or physical therap* or physiotherap* or occupational therap*) N2 (assistant* or aid*) )  **S12** health personnel  **S13** S5 OR S6 OR S7 OR S8 OR S9 OR S10 OR S11 OR S12  **S14** S4 AND S13  **S15** S4 AND S13 (limit 1993-current) (limit Eng/French) |
| **ProQuest (ERIC, PAIS Index, Dissertations & Theses Global, Canadian Research Index, Dissertations & Theses @ Universite de Montreal)** | 627 | (ab(wheelchair* OR ("wheel chair" OR "wheel chairs") OR scooter* OR ((wheeled OR motorized OR motorised ) NEAR/2 mobility)) AND ((((educat* OR teach* OR learn* OR train* OR mentor* OR professor* OR pedagog* OR program*)) NEAR/2 (universit* OR academ* OR curricul* OR student* OR personnel* OR professional* OR clinician* OR ("physical therapies" OR "physical therapist" OR "physical therapists" OR "physical therapy") OR physiotherap* OR ("occupational therapies" OR "occupational therapist" OR "occupational therapists" OR "occupational therapy") OR nurse* OR physician* OR ("recreation therap*") OR physiatrist* OR prosthetist* OR orthotist* OR technician* OR develop* OR integrat* OR implement* OR ("frame work") OR framework* OR model* OR approach*)) OR ((rehab* OR "physical therap*" OR physiotherap* OR "occupational therap*") NEAR/2 (assistant* OR aid*)) OR ((clinical OR clinician* OR assess*) NEAR/2 (skill* OR competen* OR outcome*)) OR ((wheelchair* OR ("wheel chair" OR "wheel chairs")) NEAR/2 (("service provision" OR "service provisioning" OR "service provisions") OR ("care delivered" OR "care delivery") OR ("care provision" OR "care provisions") OR ("service delivered" OR "service deliveries" OR "service delivering" OR "service delivers" OR "service delivery"))))) AND (la.exact("ENG" OR "FRE") AND pd(19930101-20201231)) |

# 
